# Supplementary material for: Time-course of coherence in the human basal ganglia during voluntary movements
Source: PubMed Central journal article supplement (PMC5057143; doi:10.1038/srep34930), 2016-10-11
Supplement: srep34930-s1.pdf [file srep34930-s1.pdf]

# Time-course of coherence in the human basal ganglia during voluntary movements

**Omid Talakoub<sup>1,2\*</sup>, Bogdan Neagu<sup>3</sup>, Kaviraja Udupa<sup>3</sup>, Eric Tsang<sup>3</sup>, Robert Chen<sup>3,4</sup>, Milos R Popovic<sup>2,5</sup>, and Willy Wong<sup>1,2\*</sup>**

<sup>1</sup>Department of Electrical and Computer Engineering, University of Toronto, Canada

<sup>2</sup>Institute of Biomaterials and Biomedical Engineering, University of Toronto, Canada

<sup>3</sup>Toronto Western Research Institute, University Health Network, Canada

<sup>4</sup>Division of Neurology, Faculty of Medicine, University of Toronto, Canada

<sup>5</sup>Rehabilitation Engineering Laboratory, Toronto Rehabilitation Institute, University Health Network, Canada

\*omid.talakoub@utoronto.ca, willy.wong@utoronto.ca

## Supplementary Table

| Age | Site | Predominant symptoms pre-operatively                               | Medication (dose/day, LED/day in PD)                                                 | Therapeutic DBS settings                                                      | DBS pair used in the analysis |
|-----|------|--------------------------------------------------------------------|--------------------------------------------------------------------------------------|-------------------------------------------------------------------------------|-------------------------------|
| 49  | GPI  | Cervical dystonia, pain in neck and rest of body.                  | -                                                                                    | RGPi 2.7 V/60 $\mu$ s/130 Hz/ (1-, C+); LGPi 2.6V/60 $\mu$ s/130 Hz/ (5-, C+) | 2-1, 6-5                      |
| 58  | GPI  | Cervical dystonia, pain in neck                                    | clonazepam 1.5 mg, gabapentin 1800 mg, nortriptyline 400 mg, lorazepam 3 mg, codeine | RGPi 2.9V/60 $\mu$ s/130 Hz/ (2-, C+); LGPi 4V/60 $\mu$ s/130Hz/ (5-, C+)     | 2-1, 6-5                      |
| 52  | GPI  | Cervical dystonia with right laterocollis and retrocollis, pain    | Clonazepam 2mg, citalopram 40 mg                                                     | RGPi 3.0V/60 $\mu$ s/130Hz/ (3-, C+); LGPi 2.9V/90 $\mu$ s/130Hz/ (6-, C+)    | 2-3, 5-6                      |
| 53  | GPI  | Cervical dystonia with left torticollis                            | Lorazepam 12mg                                                                       | LGPI 3V/60 $\mu$ s/130Hz/ (2-, C+); RGPi 1.8V/60 $\mu$ s/130Hz/ (6-, C+)      | 2-1, 5-6                      |
| 88  | GPI  | Right hemidystonia                                                 | clonazepam 3 mg                                                                      | LGPI 2.5V/60 $\mu$ s/60Hz/ (5-, C+)                                           |                               |
| 45  | GPI  | Dopa-responsive dystonia of the right leg, gait impairment         | 1090 mg                                                                              | RGPi 1.4V/60 $\mu$ s/130Hz (3-, C+); LGPi 4.0V/60 $\mu$ s/130Hz/ (7-, C+)     | 2-3, 6-7                      |
| 44  | GPI  | Orofacial dystonia/Cranio-cervical dystonia/Meige's syndrom + pain | Lorazepam 3mg                                                                        | RGPi 4.3V/60 $\mu$ s/130Hz (1-2-, C+); LGPi 3.3V/120 $\mu$ s/130Hz (7-, C+)   | 2-1, 6-7                      |
| 54  | STN  | Longer OFF periods, freezing                                       | 1000 mg                                                                              | RSTN 4.0V/60 $\mu$ s/80Hz, (3-, C+); LSTN 4.4V/60 $\mu$ s/80Hz/ (6-, C+)      | 2-3, 5-6                      |
| 65  | STN  | PD                                                                 | 600 mg                                                                               | RSTN 3.4V/60 $\mu$ s/185Hz/ (2-, C+); LSTN 3.2V/60 $\mu$ s/185Hz/ (6-, C+)    | 2-1, 5-6                      |
| 50  | STN  | Tremor dominant PD                                                 | 1200 mg                                                                              | RSTN 3.8V/60 $\mu$ s/160 Hz/ (1-, C+); LSTN 2.8V/60 $\mu$ s/160 Hz/ (5-, C+)  | 2-1, 5-6                      |
| 50  | STN  | PD                                                                 | 1100 mg                                                                              | RSTN 3.0V/60 $\mu$ s/130 Hz/ (2-, C+); LSTN 3.4V/60 $\mu$ s/130Hz/ (7-, C+)   | 2-1, 6-7                      |
| 56  | STN  | Tremor dominant PD                                                 | 1800 mg                                                                              | RSTN 2.8V/90 $\mu$ s/185Hz/ (2-, C+); LSTN 3.8V/90 $\mu$ s/185Hz/ (7-, C+)    | 2-1, 6-7                      |
| 44  | STN  | Tremor dominant PD                                                 | 850 mg                                                                               | RSTN 2.1V/60 $\mu$ s/130Hz/ (2-, C+); LSTN 2.3V/60 $\mu$ s/130Hz/ (5-, 6+)    | 2-1, 6-5                      |

**Table S1.** Clinical details of the patients studied.

## Supplementary Figures

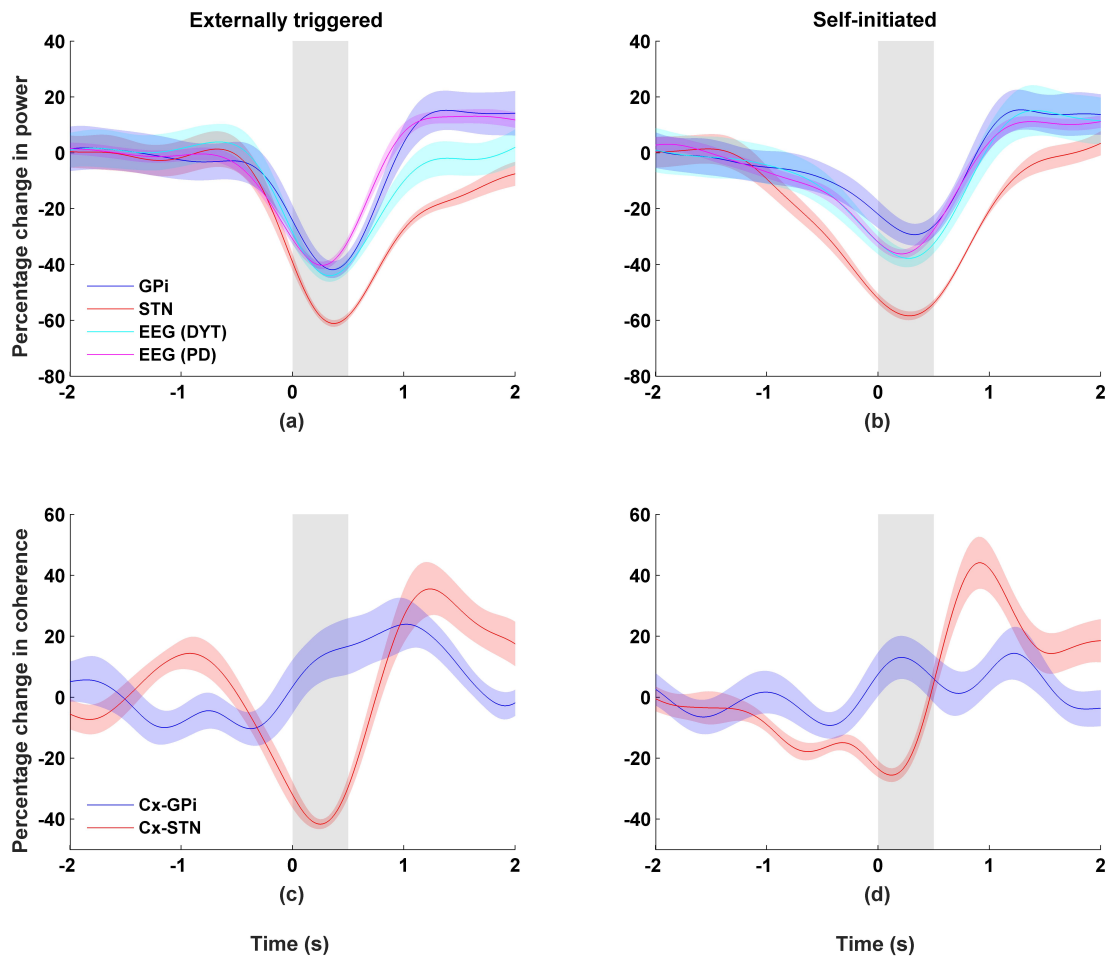

**Figure S1.** Beta band activity recorded from the side ipsilateral to the moving wrist. Movement duration indicated by grey area and shaded areas show standard errors. Left column indicates externally triggered task; right column the self-initiated task. Percentage changes for beta band (65-80Hz) showing (a/b) power (c/d) coherence between cortex-GPi or cortex-STN.

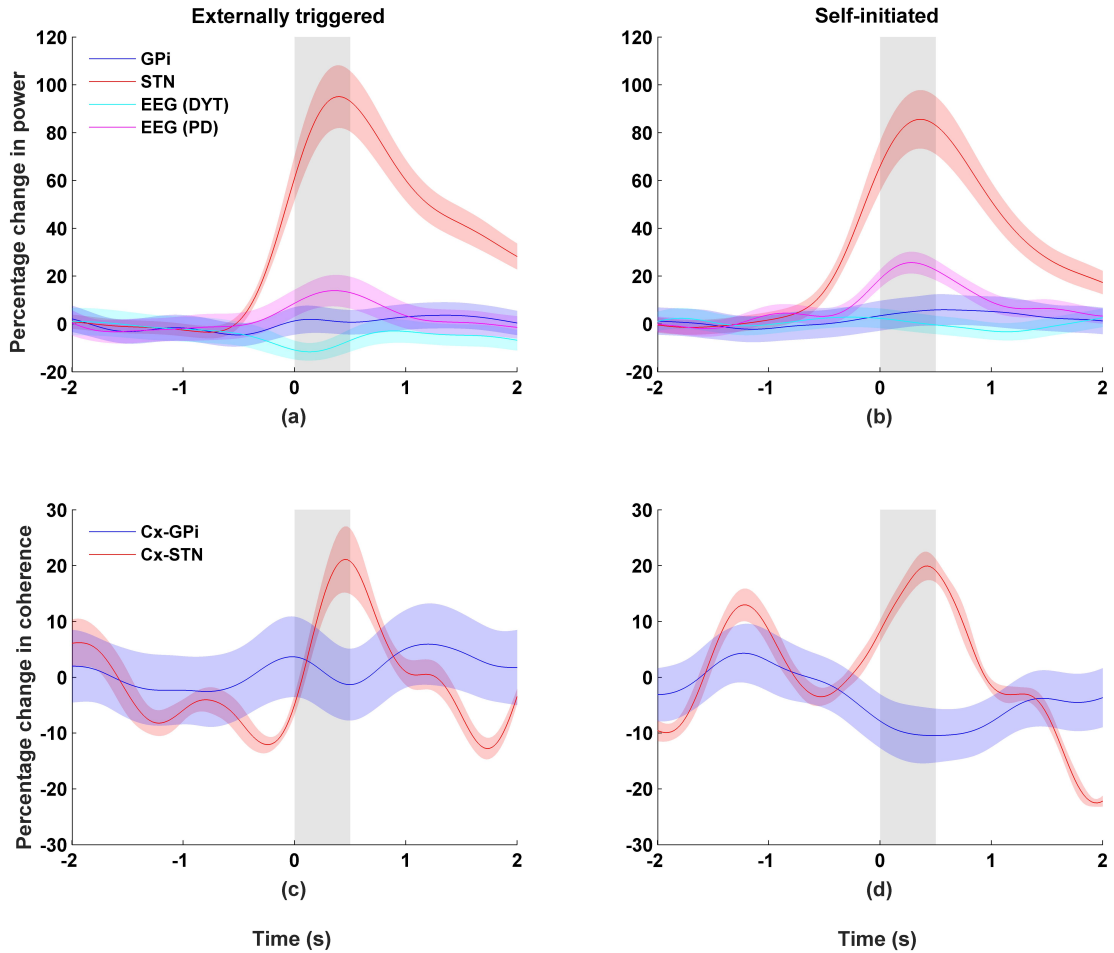

**Figure S2.** Gamma band activity recorded from the side ipsilateral to the moving wrist. Movement duration indicated by grey area and shaded areas show standard errors. Left column indicates externally triggered task; right column the self-initiated task. Percentage changes for beta band (65-80Hz) showing (a/b) power (c/d) coherence between cortex-GPi or cortex-STN.

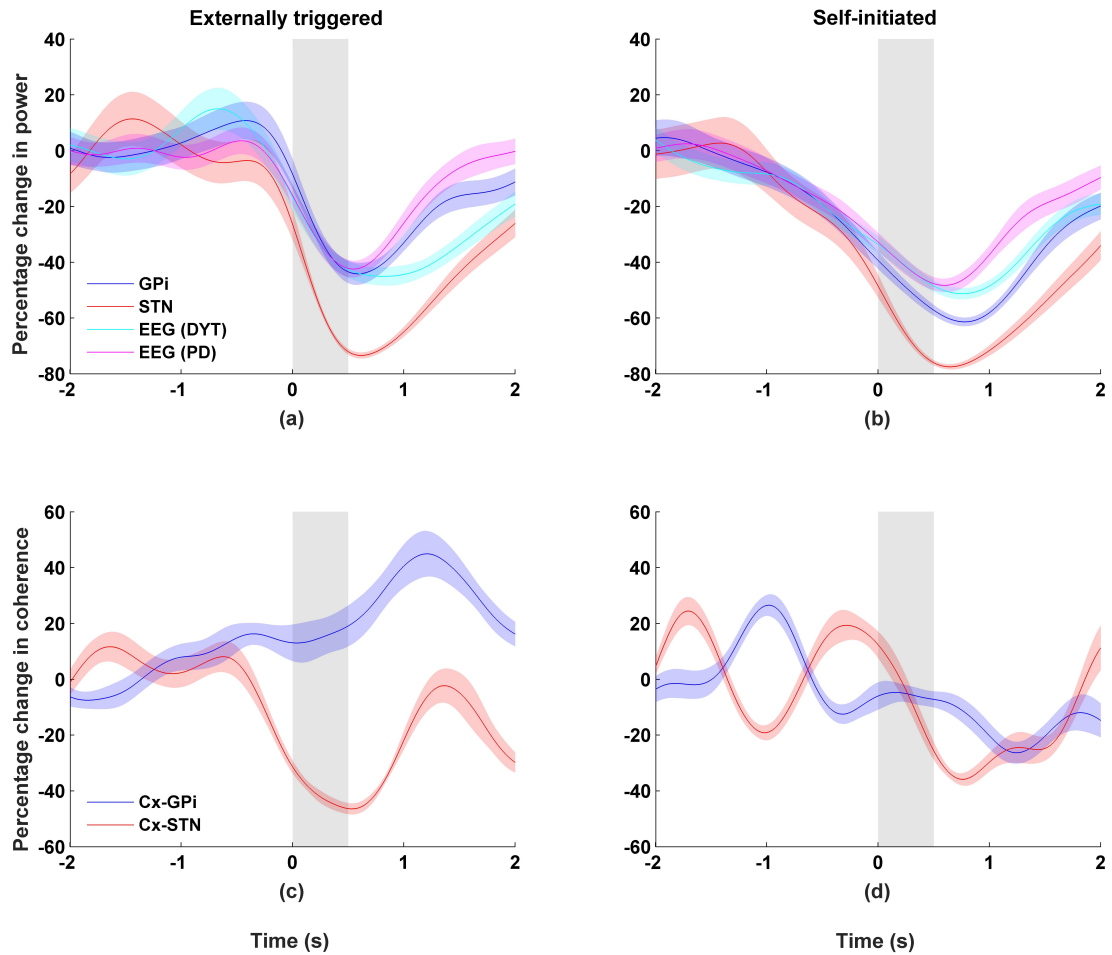

**Figure S3.** Alpha band activity recorded from the side ipsilateral to the moving wrist. Movement duration indicated by grey area and shaded areas show standard errors. Left column indicates externally triggered task; right column the self-initiated task. Percentage changes for beta band (8-12Hz) showing (a/b) power (c/d) coherence between cortex-GPi or cortex-STN.

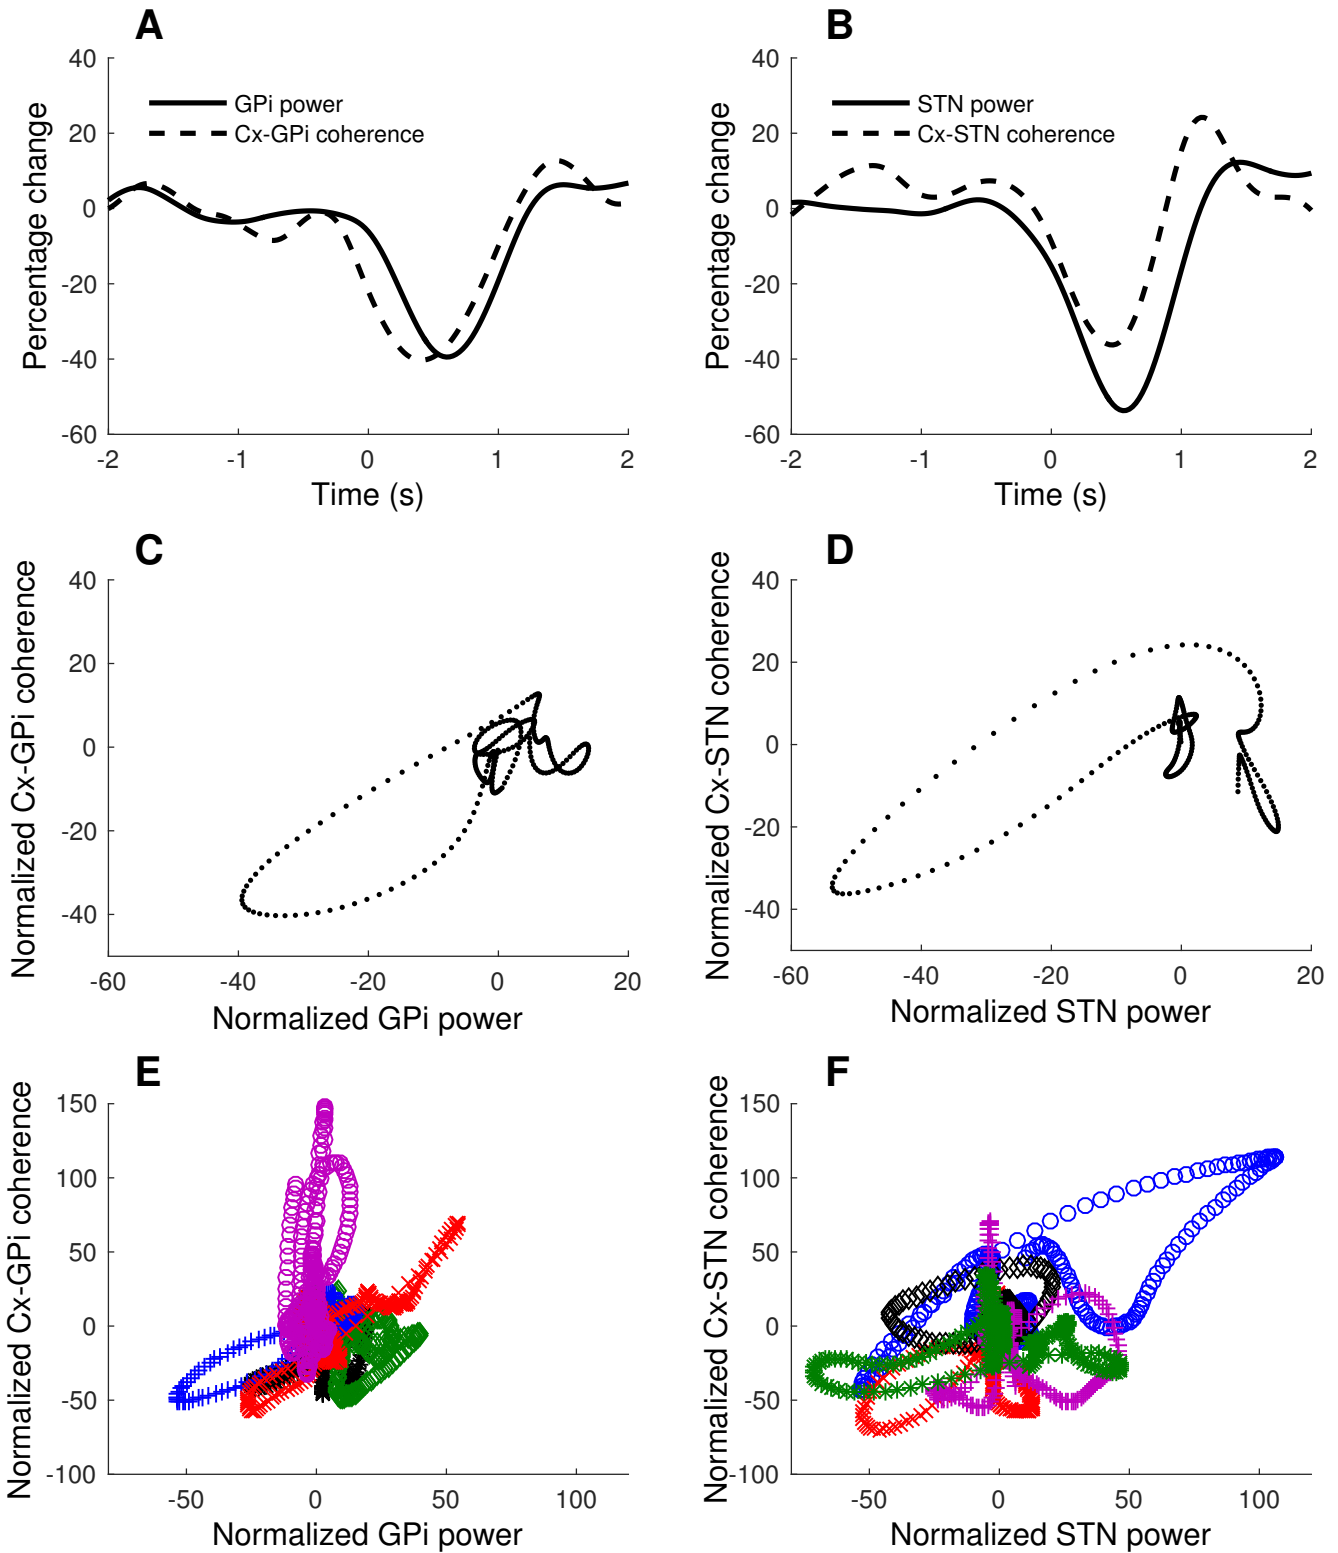

**Figure S4.** Percentage changes in power and coherence with respect to the baseline on the side contralateral to moving wrist during externally triggered movements. Baseline is defined as the average power between -4 and -3 seconds. (a and c) Grand average power and coherence for GPI patients; (b and d) for STN patients; (e) normalized coherence between Cx-GPI plotted against GPI power for five individuals; (f) normalized coherence between Cx-STN plotted against STN power for five individuals.
